# Supplementary material for: Early-onset cardiac dysfunction following allogeneic haematopoietic stem cell transplantation
Source: PubMed Central journal article supplement (PMC9125755; doi:10.1136/openhrt-2022-002007), 2022-05-19

## Supplemental material

### Early-Onset Cardiac Dysfunction Following Allogeneic Haematopoietic Stem Cell Transplantation

Shohei Moriyama<sup>a</sup>, Mitsuhiro Fukata<sup>a</sup>, Michinari Hieda<sup>a</sup>, Taku Yokoyama<sup>a</sup>, Goichi Yoshimoto<sup>a</sup>, Hitoshi Kusaba<sup>a</sup>, Yasuhiro Nakashima<sup>b</sup>, Toshihiro Miyamoto<sup>c</sup>, Toru Maruyama<sup>d</sup>, Koichi Akashi<sup>a</sup>

<sup>a</sup>Department of Haematology, Oncology and Cardiovascular Medicine, Kyushu University Hospital, Fukuoka, Japan; <sup>b</sup>Department of Medicine and Bioregulatory Science, Graduate School of Medical sciences, Kyushu University, Fukuoka, Japan; <sup>c</sup> Department of Hematology, Faculty of Medicine, Institute of Medical Pharmaceutical and Health Sciences, Kanazawa University, Ishikawa, Japan; <sup>d</sup>Campus Life Health Centre, Kyushu University, Fukuoka, Japan

| Supplemental Table 1. Baseline echocardiographic parameters |                     |                      |          |
|-------------------------------------------------------------|---------------------|----------------------|----------|
|                                                             | CTRCD<br>(n=23)     | Non-CTRCD<br>(n=113) | P-value* |
| <b>Dimension</b>                                            |                     |                      |          |
| LVEF (%)                                                    | 65.8 (64.4-70.0)    | 69.1 (63.3-74.0)     | 0.158    |
| LV end-diastolic diameter (mm)                              | 47.0 (43.0-51.0)    | 47.0 (44.0-51.0)     | 0.914    |
| LV end-systolic diameter (mm)                               | 31.0 (27.0-32.0)    | 29.0 (25.0-32.0)     | 0.249    |
| Left atrial diameter (mm)                                   | 32.5 (27.8-36.0)    | 34.0 (29.5-38.0)     | 0.245    |
| <b>Transmitral flow</b>                                     |                     |                      |          |
| Peak E wave velocity (cm/s)                                 | 73 (57.4-82.8)      | 71.1 (59.0-88.8)     | 0.967    |
| Peak A wave velocity (cm/s)                                 | 65.8 (51.1-81.3)    | 66.2 (53.2-77.9)     | 0.776    |
| E/A ratio                                                   | 1.2 (0.9-1.5)       | 1.1 (0.9-1.4)        | 0.401    |
| Deceleration time (ms)                                      | 183.5 (134.0-214.0) | 190.0 (158.0-227.3)  | 0.412    |
| <b>Tissue doppler</b>                                       |                     |                      |          |
| e' velocity (cm/s)                                          | 8.8 (6.6-11.1)      | 8.0 (6.5-9.6)        | 0.508    |
| a' velocity (cm/s)                                          | 9.2 (7.8-11.3)      | 9.3 (7.9-10.5)       | 0.897    |
| s' velocity (cm/s)                                          | 8.2 (6.9-9.9)       | 8.5 (7.3-9.5)        | 0.870    |
| E/e' ratio                                                  | 8.0 (6.3-11.7)      | 8.6 (7.4-10.9)       | 0.569    |

Values are median (25<sup>th</sup> to 75<sup>th</sup> percentile). \*: CTRCD vs. Non-CTRCD.

CTRCD, cancer therapy-related cardiac dysfunction; EF, ejection fraction; LV, left ventricular.

Supplemental Table 2. Age- and sex-adjusted multivariate analyses of risk factors for early-onset CTRCD after HSCT

|                                               | Model 1                |       | Model 2                |       | Model 3                |       | Model 4                |       | Model 5                |       |
|-----------------------------------------------|------------------------|-------|------------------------|-------|------------------------|-------|------------------------|-------|------------------------|-------|
|                                               | Odds ratio<br>[95% CI] | P     | Odds ratio<br>[95% CI] | P     | Odds ratio<br>[95% CI] | P     | Odds ratio<br>[95% CI] | P     | Odds ratio<br>[95% CI] | P     |
| CCr, /10 ml/min                               | 0.87 [0.74-1.03]       | 0.089 | 0.87 [0.73-1.02]       | 0.086 | 0.89 [0.74-1.03]       | 0.106 | 0.89 [0.71-0.99]       | 0.030 | -                      | -     |
| Cumulative DXR dose,<br>/10 mg/m <sup>2</sup> | 1.03 [1.00-1.07]       | 0.082 | -                      | -     | -                      | -     | -                      | -     | 1.03 [1.00-1.07]       | 0.045 |
| Conditioning regimen<br>with MAC              | -                      | -     | 0.46 [0.15-1.43]       | 0.179 | -                      | -     | -                      | -     | 0.41 [0.13-1.28]       | 0.109 |
| HCT-CI, /point                                | -                      | -     | -                      | -     | 0.89 [0.87-2.10]       | 0.179 | -                      | -     | -                      | -     |
| Acute GVHD, /grade                            | -                      | -     | -                      | -     | -                      | -     | 0.89 [1.19-2.92]       | 0.004 | -                      | -     |

  

|                                               | Model 6                |       | Model 7                |       | Model 8                |       | Model 9                |       | Model 10               |       |
|-----------------------------------------------|------------------------|-------|------------------------|-------|------------------------|-------|------------------------|-------|------------------------|-------|
|                                               | Odds ratio<br>[95% CI] | P     | Odds ratio<br>[95% CI] | P     | Odds ratio<br>[95% CI] | P     | Odds ratio<br>[95% CI] | P     | Odds ratio<br>[95% CI] | P     |
| CCr, /10 ml/min                               | -                      | -     | -                      | -     | -                      | -     | -                      | -     | -                      | -     |
| Cumulative DXR dose,<br>/10 mg/m <sup>2</sup> | 0.89 [1.00-1.07]       | 0.046 | 0.89 [1.01-1.08]       | 0.013 | -                      | -     | -                      | -     | -                      | -     |
| Conditioning regimen<br>with MAC              | -                      | -     | -                      | -     | 0.46 [0.15-1.45]       | 0.172 | 0.43 [0.14-1.38]       | 0.141 | -                      | -     |
| HCT-CI, /point                                | 0.89 [0.94-2.30]       | 0.095 | -                      | -     | 0.89 [0.89-2.14]       | 0.147 | -                      | -     | 0.89 [0.91-2.19]       | 0.125 |
| Acute GVHD, /grade                            | -                      | -     | 0.89 [1.25-3.14]       | 0.002 | -                      | -     | 0.89 [1.14-2.70]       | 0.008 | 0.89 [1.14-2.72]       | 0.008 |

CI, confidence interval; CR, complete remission; CTRCD, cancer therapy-related cardiac dysfunction; DXR, doxorubicin; GVHD, graft-versus-host disease; HCT-CI, haematopoietic cell transplantation-specific comorbidity index; HSCT, haematopoietic stem cell transplantation; LVEF, left ventricular ejection fraction; P, P value.

| Supplemental Table 3. Unadjusted analysis for time from HSCT to overall death |                  |         |
|-------------------------------------------------------------------------------|------------------|---------|
|                                                                               | HR [95% CI]      | P-value |
| Age                                                                           | 1.01 [0.99-1.03] | 0.313   |
| Male                                                                          | 0.95 [0.61-1.47] | 0.815   |
| CCr, /10 ml/min                                                               | 0.92 [0.86-0.98] | 0.018   |
| Cardiac risk factors $\geq 2$                                                 | 0.71 [0.34-1.47] | 0.354   |
| Leukaemia                                                                     | 0.61 [0.38-0.97] | 0.038   |
| History of HSCT                                                               | 1.53 [0.96-2.43] | 0.072   |
| Non-CR status at HSCT                                                         | 2.33 [1.39-3.90] | 0.001   |
| Haploidentical PBSCT                                                          | 2.65 [1.36-5.16] | 0.004   |
| HLA mismatch $\geq$ one locus                                                 | 1.21 [0.77-1.90] | 0.412   |
| GVHD prophylaxis including tacrolimus                                         | 1.23 [0.70-2.15] | 0.475   |
| HCT-CI, /point                                                                | 1.59 [1.28-1.97] | <0.001  |
| Acute GVHD, /grade                                                            | 1.37 [1.09-1.71] | 0.006   |
| Early-onset CTRCD                                                             | 3.30 [2.01-5.41] | <0.001  |

Number of overall deaths: 81.

CCr, creatinine clearance; CI, confidence interval; CR, complete remission; CTRCD, cancer therapy-related cardiac dysfunction; GVHD, graft-versus-host disease; HCT-CI, haematopoietic cell transplantation-specific comorbidity index; HLA, human leukocyte antigen; HR, hazard ratio; HSCT, haematopoietic stem cell transplantation; PBSCT, peripheral blood stem cell transplantation.

---

Supplemental Table 4. Cause of death in patients with early-onset CTRCD

---

|                              | All (n=136) | CTRCD (n=23) | Non-CTRCD (n=113) |
|------------------------------|-------------|--------------|-------------------|
| All cause death, n (%)       | 81 (60)     | 22 (96)      | 59 (52)           |
| Primary disease death, n (%) | 39 (29)     | 12 (52)      | 27 (24)           |
| Treatment-related death      | 42 (31)     | 10 (43)      | 32 (28)           |
| GVHD, n (%)                  | 7 (5)       | 3 (13)       | 4 (4)             |
| Infection, n (%)             | 30 (22)     | 7 (30)       | 23 (2)            |
| Others*, n (%)               | 5 (4)       | 0 (0)        | 5 (4)             |

---

CTRCD, cancer therapy-related cardiac dysfunction; GVHD, graft-versus-host disease.

\*Others: other type cancer, thrombotic microangiopathy, sinusoidal obstruction syndrome/veno-occlusive disease, non-infectious pulmonary complications, cerebral and/or gastrointestinal haemorrhage.

| Supplemental Table 5. Unadjusted analysis for time from HSCT to primary disease death |                   |         |
|---------------------------------------------------------------------------------------|-------------------|---------|
|                                                                                       | HR [95% CI]       | P-value |
| Age                                                                                   | 1.00 [0.98-1.03]  | 0.767   |
| Male                                                                                  | 0.85 [0.45-1.59]  | 0.601   |
| CCr, /10 ml/min                                                                       | 0.91 [0.82-1.00]  | 0.070   |
| Cardiac risk factors $\geq 2$                                                         | 0.53 [0.16-1.73]  | 0.296   |
| Leukaemia                                                                             | 0.48 [0.25-0.91]  | 0.026   |
| History of HSCT                                                                       | 1.38 [0.70-2.73]  | 0.351   |
| Non-CR status at HSCT                                                                 | 6.26 [2.22-17.68] | <0.001  |
| Haploidentical PBSCT                                                                  | 4.32 [1.89-9.86]  | <0.001  |
| HLA mismatch $\geq$ one locus                                                         | 1.62 [0.82-3.19]  | 0.167   |
| GVHD prophylaxis including tacrolimus                                                 | 0.82 [0.40-1.69]  | 0.600   |
| HCT-CI, /point                                                                        | 1.59 [1.15-2.16]  | 0.004   |
| Acute GVHD, /grade                                                                    | 0.93 [0.68-1.27]  | 0.635   |
| Early-onset CTRCD                                                                     | 3.91 [1.97-7.77]  | <0.001  |

Number of primary disease death: 39.

CCr, creatinine clearance; CI, confidence interval; CR, complete remission; CTRCD, cancer therapy-related cardiac dysfunction; GVHD, graft-versus-host disease; HCT-CI, haematopoietic cell transplantation-specific comorbidity index; HLA, human leukocyte antigen; HR, hazard ratio; HSCT, haematopoietic stem cell transplantation; PBSCT, peripheral blood stem cell transplantation.

Supplemental Table 6. Adjusted analyses of the association between early-onset CTRCD and time from HSCT to primary disease death

|         | HR [95% CI]      | P-value |
|---------|------------------|---------|
| Model 1 | 3.50 [1.66-7.34] | 0.001   |
| Model 2 | 3.77 [1.85-7.70] | <0.001  |
| Model 3 | 3.77 [1.84-7.71] | <0.001  |
| Model 4 | 3.20 [1.50-6.82] | 0.003   |
| Model 5 | 3.09 [1.48-6.47] | 0.003   |
| Model 6 | 3.43 [1.60-7.36] | 0.002   |
| Model 7 | 2.84 [1.33-6.06] | 0.007   |
| Model 8 | 3.26 [1.60-6.64] | 0.001   |

Model 1: adjusting age, sex, CCr, and disease type\*.

Model 2: adjusting age, sex, disease status†, and source of HSCT‡.

Model 3: adjusting age, sex, source of HSCT‡, and HCT-CI.

Model 4: adjusting CCr, disease type\*, disease status†, source of HSCT‡.

Model 5: adjusting CCr, disease type\*, disease status†, and HCT-CI.

Model 6: adjusting CCr, disease type\*, source of HSCT‡, and HCT-CI.

Model 7: adjusting CCr, disease status†, source of HSCT‡, and HCT-CI.

Model 8: adjusting disease type\*, disease status†, source of HSCT‡, and HCT-CI.

\*, leukaemia or not; † CR or not; ‡, haploidentical PBSCT or not.

CCr, creatinine clearance; CI, confidence interval; CR, complete remission; CTRCD, cancer therapy-related cardiac dysfunction; GVHD, graft-versus-host disease; HCT-CI, haematopoietic cell transplantation-specific comorbidity index; HR, hazard ratio; PBSCT, peripheral blood stem cell transplantation.

| Supplemental Table 7. Unadjusted analysis for time from HSCT to treatment related death |                  |         |
|-----------------------------------------------------------------------------------------|------------------|---------|
|                                                                                         | HR [95% CI]      | P-value |
| Age                                                                                     | 1.01 [0.99-1.04] | 0.266   |
| Male                                                                                    | 1.06 [0.57-1.95] | 0.857   |
| CCr, /10 ml/min                                                                         | 0.93 [0.84-1.02] | 0.122   |
| Cardiac risk factors $\geq 2$                                                           | 0.88 [0.35-2.24] | 0.788   |
| Leukaemia                                                                               | 0.78 [0.40-1.53] | 0.468   |
| History of HSCT                                                                         | 1.67 [0.89-3.14] | 0.111   |
| Non-CR status at HSCT                                                                   | 1.28 [0.67-2.41] | 0.453   |
| Haploidentical PBSCT                                                                    | 1.38 [0.42-4.48] | 0.597   |
| HLA mismatch $\geq$ one locus                                                           | 0.94 [0.51-1.73] | 0.838   |
| GVHD prophylaxis including tacrolimus                                                   | 2.02 [0.80-5.15] | 0.139   |
| HCT-CI, /point                                                                          | 1.60 [1.17-2.14] | 0.002   |
| Acute GVHD, /grade                                                                      | 2.00 [1.45-2.79] | <0.001  |
| Early-onset CTRCD                                                                       | 2.77 [1.35-5.69] | 0.005   |

Number of primary disease death: 42.

CCr, creatinine clearance; CI, confidence interval; CR, complete remission; CTRCD, cancer therapy-related cardiac dysfunction; GVHD, graft-versus-host disease; HCT-CI, haematopoietic cell transplantation-specific comorbidity index; HLA, human leukocyte antigen; HR, hazard ratio; HSCT, haematopoietic stem cell transplantation; PBSCT, peripheral blood stem cell transplantation.



**Supplemental Figure 1. LVEF change in CTRCD and non-CTRCD group**

LVEF decreased from 66% (64%-70%) to 41% (26%-50%) in the early-onset CTRCD group ( $p<0.001$ ) and from 69% (63%-74%) to 66% (60%-73%) in the non-early-onset CTRCD group ( $p<0.001$ ) after HSCT (interaction- $p<0.001$ ).

CTRCD, cancer therapy-related cardiac dysfunction; HSCT, haematopoietic stem cell transplantation; LVEF, left ventricular ejection fraction

**Supplemental Figure 2. Difference in LVEF reduction between patients with low-grade and high-grade acute GVHD**

The reduction in LVEF was significantly higher in patients with high-grade acute GVHD than in patients with low-grade GVHD ( $p=0.045$ ).

IQR, interquartile range; LVEF, left ventricular ejection fraction; GVHD, graft-versus-host disease

**Supplemental Figure 3. OS with respect to the presence of heart failure symptoms in patients with CTRCD**

In patients with CTRCD, the median OS was significantly shorter in patients with heart failure symptoms than in those without heart failure symptoms ( $p=0.006$ ).

CI, confidence interval; CTRCD, cancer therapy-related cardiac dysfunction; HSCT, haematopoietic stem cell transplantation; OS, overall survival

Supplemental Figure 1

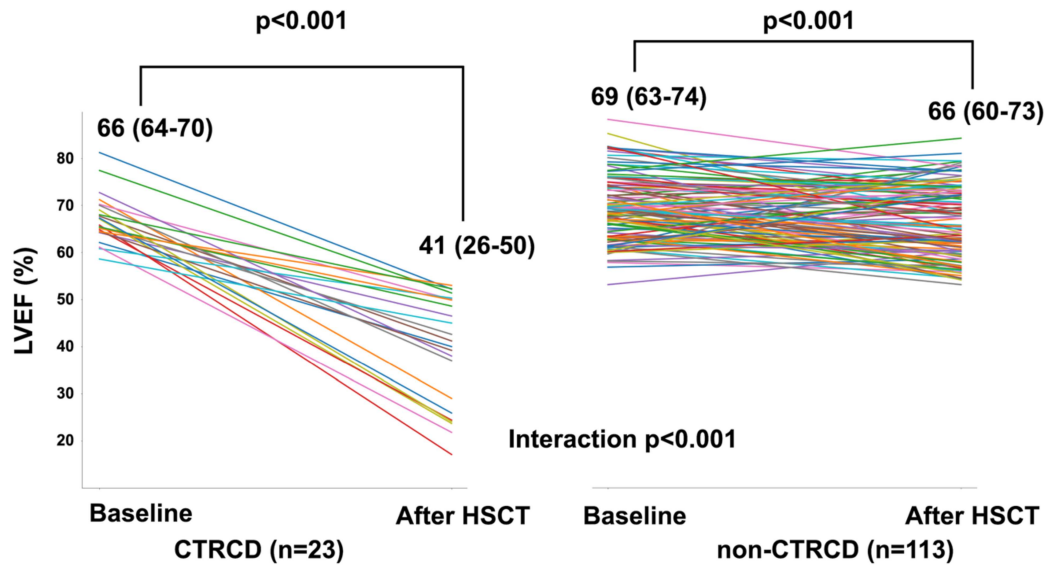

Supplemental Figure 2

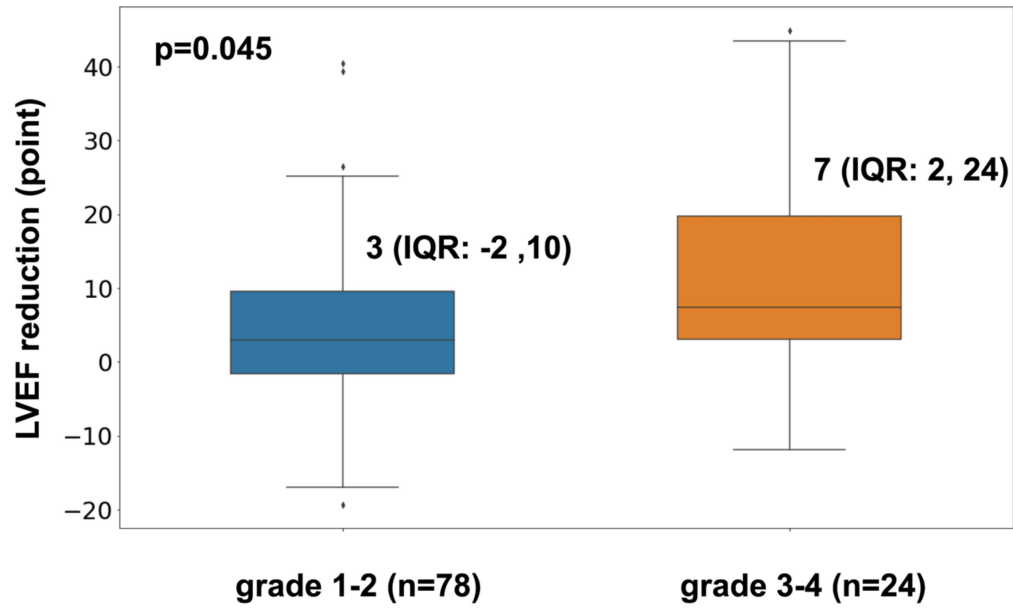

Supplemental Figure 3

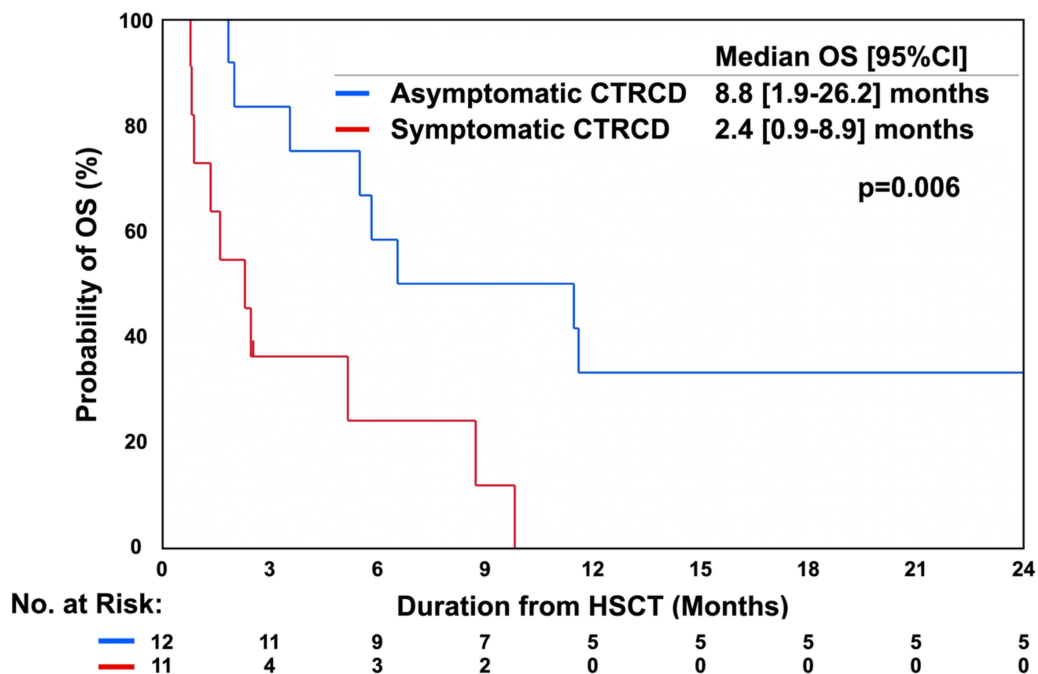

Supplement: openhrt-2022-002007supp001.pdf [file openhrt-2022-002007supp001.pdf]
